# Supplementary material
Source: PubMed Central journal article supplement (PMC7457949)
Supplement: ry192793suppa1.pdf [file ry192793suppa1.pdf]

**Table E1. Summary of MRI acquisition parameters**

|                          | Single-delay ASL                                     | Multidelay ASL<br>(Hadamard encoding)                | T1 W                                         | T2-FLAIR      | Phase-Contrast angiography                 |
|--------------------------|------------------------------------------------------|------------------------------------------------------|----------------------------------------------|---------------|--------------------------------------------|
| Sequence                 | three-dimensional fast spin echo with spiral readout | three-dimensional fast spin echo with spiral readout | three-dimensional fast spoiled gradient echo | 2-D spin echo | Cardiac gated fast low-angle gradient echo |
| Repetition time (ms)     | 4854                                                 | 6891                                                 | 9.6                                          | 9500          | 12.4                                       |
| Echo time (ms)           | 10.7                                                 | 22.7                                                 | 3.8                                          | 140           | 4.6                                        |
| Inversion time (ms)      | —                                                    | —                                                    | 400                                          | 2300          | —                                          |
| Flip angle (degree)      | —                                                    | —                                                    | 13                                           | 111           | 20                                         |
| Label duration (ms)      | 1450                                                 | 1700                                                 | —                                            | —             | —                                          |
| Postlabel delay (ms)     | 2025                                                 | 300, 2000, 3700<br>(effective postlabel delay)       | —                                            | —             | —                                          |
| In plane resolution (mm) | 3.73                                                 | 5.77                                                 | 0.94                                         | 0.47          | 0.375                                      |
| Slice thickness (mm)     | 4.0                                                  | 4.0                                                  | 1.0                                          | 5.0           | 3.0                                        |
| Number of averages       | 3                                                    | 2                                                    | 1                                            | 1             | 2                                          |
| Encoding velocity (cm/s) | No vascular crushing                                 | 4                                                    | —                                            | —             | 100                                        |
| Spiral number of arms    | 8                                                    | 4                                                    | —                                            | —             | —                                          |
| Points/arm               | 512                                                  | 512                                                  | —                                            | —             | —                                          |
| Acquisition time (min)   | 4:13                                                 | 4:47                                                 | 3:36                                         | 2:23          | 1:30                                       |

Note.—ASL = arterial spin labeling, T1 W = T1 weighted image, T2-FLAIR = T2 weighted fluid-attenuated inversion recovery image.

**Table E2. Image quality metrics of model predictions and relative cerebral blood flow change measured by arterial spin labeling.**

| Patients with Moyamoya Disease ( <i>n</i> = 24) |       |       |               |                         |      |     |               |                         |       |       |               |                         |
|-------------------------------------------------|-------|-------|---------------|-------------------------|------|-----|---------------|-------------------------|-------|-------|---------------|-------------------------|
|                                                 | RMSE  |       |               |                         | PSNR |     |               |                         | SSIM  |       |               |                         |
|                                                 | Mean  | STD   | Friedman test | Post hoc*               | Mean | STD | Friedman test | Post hoc*               | Mean  | STD   | Friedman test | Post hoc*               |
| <b>PET-plus-MRI</b>                             | 0.142 | 0.032 | $p < 0.001$   | <sup>a</sup> $P < .001$ | 21.6 | 1.2 | $p < 0.001$   | <sup>a</sup> $P < .001$ | 0.590 | 0.073 | $p < 0.001$   | <sup>a</sup> $P < .001$ |
| <b>MRI-only</b>                                 | 0.144 | 0.034 |               | <sup>b</sup> $P < .001$ | 21.5 | 1.4 |               | <sup>b</sup> $P < .001$ | 0.572 | 0.074 |               | <sup>b</sup> $P < .001$ |
| <b>ASL-rΔCBF</b>                                | 0.370 | 0.205 |               | <sup>c</sup> $P = .39$  | 14.2 | 4.9 |               | <sup>c</sup> $P = .39$  | 0.253 | 0.163 |               | <sup>c</sup> $P = .25$  |
| Healthy Controls ( <i>n</i> = 12)               |       |       |               |                         |      |     |               |                         |       |       |               |                         |
|                                                 | RMSE  |       |               |                         | PSNR |     |               |                         | SSIM  |       |               |                         |
| Model                                           | Mean  | STD   | Friedman test | Post hoc*               | Mean | STD | Friedman test | Post hoc                | Mean  | STD   | Friedman test | Post hoc*               |
| <b>PET-plus-MRI</b>                             | 0.126 | 0.024 | $p < 0.001$   | <sup>a</sup> $P = .003$ | 22.9 | 0.7 | $p = 0.005$   | <sup>a</sup> $P < .001$ | 0.633 | 0.086 | $p < 0.001$   | <sup>a</sup> $P < .001$ |
| <b>MRI-only</b>                                 | 0.136 | 0.017 |               | <sup>b</sup> $P = .31$  | 22.1 | 0.7 |               | <sup>b</sup> $P = .10$  | 0.613 | 0.068 |               | <sup>b</sup> $P = .004$ |
| <b>ASL-rΔCBF</b>                                | 0.217 | 0.115 |               | <sup>c</sup> $P = .31$  | 19.0 | 3.9 |               | <sup>c</sup> $P = .10$  | 0.416 | 0.174 |               | <sup>c</sup> $P = .10$  |

Note.—ASL-rΔCBF = relative cerebral blood flow change measured by multidelay arterial spin labeling, PSNR = peak signal-to-noise ratio, RMSE = root mean squared error, SSIM = structural similarity index, STD = standard deviation.

\* Post hoc test is performed by Dunn's multiple comparison test.

<sup>a</sup> Indicates PET-plus-MRI versus ASL-rΔCBF.

<sup>b</sup> Indicates MRI-only versus ASL-rΔCBF.

<sup>c</sup> Indicates PET-plus-MRI versus MRI-only.
